# Supplementary material
Source: PubMed Central journal article supplement (PMC4341070)
Supplement: supp_btu724_patchsurfer20_supplmaterial_revision3.pdf [file supp_btu724_patchsurfer20_supplmaterial_revision3.pdf]

Supplementary Material for

## Large-scale binding ligand prediction by improved patch-based method Patch-Surfer2.0

Xiaolei Zhu<sup>1</sup>, Yi Xiong<sup>1</sup>, and Daisuke Kihara<sup>1,2,\*</sup>

<sup>1</sup>Department of Biology, Purdue University, West Lafayette, IN 47906, USA.

<sup>2</sup>Department of Computer Science, Purdue University, West Lafayette, IN 47906, USA.

Contact: dkihara@purdue.edu

**Table S1.** The 117 types of ligands that have more than 5 entries in the binding pocket database.

| Ligand ID | Number of Pockets | Number of Atoms (atmn) | Number of Rotatable single bonds(rotb) | logP   | rotb/atmn |
|-----------|-------------------|------------------------|----------------------------------------|--------|-----------|
| AMP       | 46                | 23                     | 4                                      | -1.521 | 0.174     |
| ATP       | 44                | 31                     | 8                                      | -3.535 | 0.258     |
| FAD       | 82                | 53                     | 13                                     | -2.692 | 0.245     |
| FMN       | 49                | 31                     | 7                                      | -1.426 | 0.226     |
| GLC       | 27                | 12                     | 1                                      | -2.643 | 0.083     |
| HEM       | 146               | 43                     | 8                                      | 6.102  | 0.186     |
| NAD       | 39                | 44                     | 11                                     | -6.064 | 0.250     |
| HEZ       | 16                | 8                      | 5                                      | 0.6    | 0.625     |
| BCN       | 6                 | 11                     | 6                                      | -2.589 | 0.545     |
| CIT       | 120               | 13                     | 5                                      | -1.983 | 0.385     |
| PMP       | 7                 | 16                     | 4                                      | -1.367 | 0.250     |
| GSH       | 7                 | 20                     | 9                                      | -4.971 | 0.450     |
| ANP       | 33                | 31                     | 8                                      | -3.734 | 0.258     |
| ARG       | 10                | 12                     | 6                                      | -5.294 | 0.500     |
| C8E       | 8                 | 21                     | 18                                     | 2.417  | 0.857     |
| CDP       | 6                 | 25                     | 6                                      | -3.605 | 0.240     |
| MBO       | 12                | 10                     | 1                                      | 1.432  | 0.100     |
| PLM       | 11                | 18                     | 14                                     | 7.059  | 0.778     |
| PLP       | 30                | 16                     | 4                                      | -0.762 | 0.250     |
| 12P       | 9                 | 37                     | 34                                     | -3.196 | 0.919     |
| BGC       | 30                | 12                     | 1                                      | -2.643 | 0.0833    |
| MCT       | 7                 | 9                      | 0                                      | 1.418  | 0.000     |
| ASP       | 10                | 9                      | 3                                      | -3.518 | 0.333     |
| DUP       | 6                 | 28                     | 8                                      | -4.699 | 0.286     |
| FUC       | 7                 | 11                     | 0                                      | -1.635 | 0.000     |
| HIS       | 7                 | 11                     | 3                                      | -5.039 | 0.273     |
| NHE       | 18                | 13                     | 4                                      | -0.914 | 0.308     |
| TYD       | 6                 | 25                     | 6                                      | -3.107 | 0.240     |
| DTT       | 27                | 8                      | 3                                      | -0.335 | 0.375     |

|     |     |    |    |        |        |
|-----|-----|----|----|--------|--------|
| DTU | 8   | 8  | 3  | -0.335 | 0.375  |
| 017 | 6   | 38 | 12 | 4.323  | 0.316  |
| ACO | 11  | 51 | 20 | -4.096 | 0.392  |
| ACP | 10  | 31 | 8  | -3.481 | 0.258  |
| ACR | 8   | 44 | 9  | -5.514 | 0.205  |
| GDP | 21  | 28 | 6  | -3.691 | 0.214  |
| MET | 11  | 9  | 4  | -2.239 | 0.444  |
| MYR | 6   | 16 | 12 | 6.048  | 0.750  |
| A2G | 12  | 15 | 2  | -3.083 | 0.133  |
| HEC | 13  | 43 | 6  | 5.542  | 0.140  |
| NDG | 18  | 15 | 2  | -3.083 | 0.133  |
| TMP | 9   | 21 | 4  | -2.1   | 0.190  |
| 2PE | 19  | 28 | 25 | -2.584 | 0.893  |
| GTP | 10  | 32 | 8  | -4.529 | 0.250  |
| P6G | 20  | 19 | 16 | -1.972 | 0.842  |
| GTT | 9   | 20 | 9  | -4.971 | 0.450  |
| TLA | 29  | 10 | 3  | -2.486 | 0.300  |
| NGA | 11  | 15 | 2  | -3.083 | 0.133  |
| GAL | 16  | 12 | 1  | -2.643 | 0.0833 |
| SF4 | 45  | 8  | 0  | 5      | 0.000  |
| U5P | 12  | 21 | 4  | -2.757 | 0.190  |
| BLA | 6   | 43 | 11 | 4.818  | 0.256  |
| GNP | 10  | 32 | 8  | -4.64  | 0.250  |
| PG4 | 113 | 13 | 10 | -1.564 | 0.769  |
| PG5 | 11  | 12 | 9  | -0.315 | 0.750  |
| PGE | 69  | 10 | 7  | -1.36  | 0.700  |
| UDP | 15  | 25 | 6  | -3.764 | 0.240  |
| TSU | 10  | 11 | 1  | -0.622 | 0.0909 |
| SIA | 10  | 21 | 5  | -4.131 | 0.238  |
| SIN | 14  | 8  | 3  | -0.655 | 0.375  |
| TAM | 8   | 11 | 6  | -1.304 | 0.545  |
| XYP | 7   | 10 | 0  | -2.216 | 0.000  |
| COA | 35  | 48 | 18 | -4.444 | 0.375  |
| FLC | 33  | 13 | 5  | -4.335 | 0.385  |
| LEU | 9   | 9  | 3  | -1.382 | 0.333  |
| TRP | 9   | 15 | 3  | -1.08  | 0.200  |
| TRS | 112 | 8  | 3  | -4.618 | 0.375  |
| BOG | 17  | 20 | 9  | 1.432  | 0.450  |
| EPE | 71  | 15 | 5  | -3.315 | 0.333  |
| NAG | 308 | 15 | 2  | -3.083 | 0.133  |
| NAP | 37  | 48 | 13 | -6.145 | 0.271  |
| P33 | 15  | 22 | 19 | -2.176 | 0.864  |
| PE4 | 8   | 24 | 21 | -1.277 | 0.875  |
| PEB | 6   | 43 | 12 | 5.1    | 0.279  |
| PEG | 158 | 7  | 4  | -1.156 | 0.571  |

|     |     |     |     |        |        |
|-----|-----|-----|-----|--------|--------|
| MES | 110 | 12  | 3   | -4.076 | 0.250  |
| ADN | 15  | 19  | 2   | -0.854 | 0.105  |
| MLA | 34  | 7   | 2   | -0.925 | 0.286  |
| MLI | 33  | 7   | 2   | -3.49  | 0.286  |
| MLT | 18  | 9   | 3   | -1.57  | 0.333  |
| PG6 | 6   | 18  | 15  | -0.723 | 0.833  |
| TPP | 8   | 26  | 8   | -4.753 | 0.308  |
| NCO | 10  | 7   | 0   | -5     | 0.000  |
| AKG | 8   | 10  | 4   | -1.485 | 0.400  |
| GLO | 6   | 12  | 5   | -2.643 | 0.417  |
| GLU | 12  | 10  | 4   | -3.248 | 0.400  |
| UD1 | 6   | 39  | 10  | -5.179 | 0.256  |
| 15P | 6   | 104 | 101 | -5.426 | 0.971  |
| 1PE | 43  | 16  | 13  | -1.768 | 0.813  |
| 1PG | 6   | 17  | 14  | -1.245 | 0.824  |
| 1PS | 7   | 13  | 4   | -5.644 | 0.308  |
| ADE | 9   | 10  | 0   | 0.235  | 0.000  |
| ADP | 65  | 27  | 6   | -2.528 | 0.222  |
| CMP | 12  | 22  | 1   | -1.709 | 0.0455 |
| MPD | 182 | 8   | 2   | 0.492  | 0.250  |
| MPO | 7   | 13  | 4   | -2.458 | 0.308  |
| SUC | 17  | 23  | 5   | -3.745 | 0.217  |
| CXS | 10  | 14  | 5   | -0.643 | 0.357  |
| F3S | 7   | 7   | 0   | 5      | 0.000  |
| IHP | 6   | 36  | 12  | -5.547 | 0.333  |
| POP | 11  | 9   | 2   | -4.922 | 0.222  |
| APC | 9   | 31  | 8   | -3.481 | 0.258  |
| APR | 8   | 36  | 9   | -3.409 | 0.250  |
| B30 | 6   | 25  | 5   | -1.87  | 0.200  |
| B3P | 11  | 19  | 12  | -3.524 | 0.632  |
| BTB | 25  | 14  | 8   | -2.76  | 0.571  |
| CHT | 7   | 7   | 2   | -4.236 | 0.286  |
| MRD | 56  | 8   | 2   | 0.492  | 0.250  |
| PRP | 6   | 22  | 7   | -3.817 | 0.318  |
| SAH | 27  | 26  | 7   | -2.773 | 0.269  |
| SAM | 23  | 27  | 7   | -4.143 | 0.259  |
| BEN | 16  | 9   | 1   | 0.323  | 0.111  |
| BEZ | 24  | 9   | 1   | 1.848  | 0.111  |
| MAL | 7   | 23  | 4   | -4.45  | 0.174  |
| MAN | 33  | 12  | 1   | -2.643 | 0.0833 |
| NDP | 24  | 48  | 13  | -4.229 | 0.271  |
| PQQ | 6   | 24  | 3   | 0.235  | 0.125  |
| SNG | 6   | 16  | 3   | -1.808 | 0.188  |

## Procedure applied for selecting the non-redundant ligand binding pocket database

A non-redundant database of pockets with bound ligands was constructed based on the Protein-Small-Molecule Database [http://compbio.cs.toronto.edu/psmdb/downloads/CPLX\\_25\\_0.85\\_7HA.list](http://compbio.cs.toronto.edu/psmdb/downloads/CPLX_25_0.85_7HA.list) (PSMDB) (Wallach & Lilien, 2009). First, 5,438 protein-ligand complexes selected from PDB were obtained from PSMDB. Multiple ligands in the same pocket were united if they are closer than 1.4 Å, which indicates that heavy atoms are forming a covalent bond. The cutoff value of 1.4 Å was determined by considering the lengths of covalent bonds between carbon (C), nitrogen (N), and oxygen (O). For example, the length of a single bond of C-C is on average 1.54 Å, while the length of double and triple bonds between two carbons are 1.34 Å and 1.20 Å, respectively, and the average bond length for a carbon to carbon, nitrogen, or oxygen including single, double, and triple bonds are 1.32 Å.

Small united ligands with less than seven atoms were discarded, so that ions and small ligands, such as  $\text{SO}_4^{2-}$  are discarded. The seven atoms is the cutoff used by the PSMDB. Ligand-protein pairs where a ligand is covalently bound to a protein were also removed using a distance cutoff of 1.4 Å. In cases that multiple (united) ligands exist in a protein pocket, they are treated as a group if they are closer than 4.5 Å. 4.5 Å is a standard cutoff value used to define heavy atom contacts used in computational structural studies of proteins. It is larger than 3.5 Å used below but we observed that two ligands are consistently co-localize once they are observed closer than 4.5 Å in one of pockets. Grouped ligands are removed if they are not binding to a protein, i.e. if none of their heavy atoms is closer than 3.5 Å to any heavy atom of the protein. 3.5 Å is roughly the distance between two van der Waals radius of heavy atoms. This procedure yielded 9,361 pockets. Subsequently, we further removed redundant pockets that come from pockets in homo-multimers using two criteria: Pockets from homo-multimers in the same PDB file are considered as redundant and removed, keeping only one of them if the proteins have globally similar structures (an RMSD of less than 3.0 Å) and also the pockets share more than 80% of their residues. 3.0 Å RMSD and 80% identity are cutoff values we determined by examining many ligand binding pockets. If these two conditions are met, none pockets were observed to be substantially dissimilar in the shape and interactions with ligand molecules. Ligand binding residues were identified using a distance cutoff of 5.0 Å. The whole procedure resulted in 6,547 pockets. 5.0 Å is a commonly used cutoff value to determine protein-protein and protein-ligand interactions. Each ligand-pocket entry is classified into a ligand type, e.g. ATP, FAD, etc. to be able to perform binding ligand prediction. In case multiple ligands exist in a pocket, a larger ligand is selected as the representative if the ratio of the number of heavy atoms of the ligand is over 0.5 (i.e. half) to that of all the ligands. Finally, we identified 2,444 different main ligand types in the 6,547 pockets. 117 ligand types have more than five binding pockets in the dataset.

### Reference:

The protein-small-molecule database, a non-redundant structural resource for the analysis of protein-ligand binding. Izhar Wallach and Ryan Lilien, *Bioinformatics*, 25: 615-620 (2009)

**Table S2.** Accuracy after excluding flexible ligands with different flexibility ratio.

Table 3 in the main manuscript shows the results after removing flexible ligands that have a flexibility ratio over 0.8. Here we show results after further removing flexible ligands with a flexibility ratio over 0.7, 0.6, and 0.5.

| Removed ligands          |                      | Top 5 | Top 10 | Top 15 | Top 20 | Top25 |
|--------------------------|----------------------|-------|--------|--------|--------|-------|
| Flexibility ratio cutoff | # of ligands removed |       |        |        |        |       |
| -                        | 0                    | 0.234 | 0.417  | 0.526  | 0.592  | 0.642 |
| 0.8                      | 10                   | 0.252 | 0.452  | 0.567  | 0.635  | 0.683 |
| 0.7                      | 14                   | 0.250 | 0.454  | 0.571  | 0.639  | 0.686 |
| 0.6                      | 17                   | 0.257 | 0.461  | 0.577  | 0.643  | 0.689 |
| 0.5                      | 21                   | 0.264 | 0.472  | 0.588  | 0.652  | 0.695 |

The accuracy listed as the top row, the results without removing any ligand, is the same as the one listed at the top of Table 2 (the results of the 110 ligands). The second row is the same as the top row of Table 3.

**Table S3.** A set of holo and apo proteins used in Figure S3 and Table 4.

| Holo protein | Binding ligand | Target ligand rank by holo protein | Apo protein | Target ligand rank by apo protein |
|--------------|----------------|------------------------------------|-------------|-----------------------------------|
| 1xqh_AB      | SAH            | 17                                 | 1h3i_AB     | 20                                |
| 2cch_A       | ATP            | 3                                  | 1pw2_A      | 5                                 |
| 2fh6_A       | GLC            | 10                                 | 2fgz_A      | 2                                 |
| 2fh8_A       | BGC            | 3                                  | 2fgz_A      | 1                                 |
| 2gsd_A       | NAD            | 3                                  | 2nac_A      | 2                                 |
| 2hq2_A       | HEM            | 13                                 | 1u9t_A      | 3                                 |
| 2jhf_A       | NAD            | 4                                  | 8adh_A      | 4                                 |
| 2phn_AB      | GDP            | 9                                  | 2g9i_AB     | 9                                 |
| 2vjq_AB      | EPE            | 26                                 | 1p5h_AB     | 37                                |
| 3a6t_A       | SUC            | 36                                 | 3a6s_A      | 21                                |
| 3aar_A       | ANP            | 14                                 | 3aap_A      | 13                                |
| 3f9m_A       | GLC            | 10                                 | 1v4t_A      | 2                                 |
| 3fuu_A       | ADN            | -                                  | 3fuv_A      | 18                                |
| 3fxx_A       | ANP            | 2                                  | 2gsf_A      | 4                                 |
| 3gru_A       | AMP            | 14                                 | 3fuv_A      | 7                                 |
| 3hbn_A       | UDP            | 14                                 | 3hbm_A      | 27                                |
| 3lss_A       | ATP            | 4                                  | 3lsq_A      | 2                                 |
| 3m0f_AB      | GSH            | -                                  | 3lxt_AB     | 10                                |
| 3n5o_AB      | GTT            | -                                  | 3lg6_AB     | -                                 |
| 1g5t_A       | ATP            | 5                                  | 1g5r_A      | 3                                 |
| 1h6m_A       | NAG            | 21                                 | 1sf4_A      | 23                                |
| 1x2t_B       | 1PE            | -                                  | 1x2w_B      | 28                                |
| 2vlh_A       | PGE            | 21                                 | 2ez2_A      | 15                                |

|         |     |    |         |    |
|---------|-----|----|---------|----|
| 2vlh_A  | P33 | 18 | 2ez2_A  | 6  |
| 3bpw_A  | PEG | 5  | 2q8l_A  | 7  |
| 3fek_A  | PEG | 28 | 2fs6_A  | 10 |
| 3gw8_A  | PG4 | 25 | 3ezn_A  | 5  |
| 3gw8_A  | PG4 | 6  | 3ezn_A  | 6  |
| 3gw8_AB | PG4 | 41 | 3ezn_AB | 11 |
| 3lss_A  | MLI | 32 | 3lsq_A  | -  |
| 3lss_A  | MLI | 20 | 3lsq_A  | 6  |
| 3mbm_AB | TRS | 20 | 3f0e_AB | 22 |

These apo proteins are identified as follows: For the proteins in the non-redundant binding pocket dataset, we examined the record at REMARK 900 in their PDB files where a list of related PDB entries are provided, and found apo proteins for 96 proteins. Proteins were removed if there are less than 5 holo proteins in the database.

To define a ligand binding pocket of an apo protein, residues are determined as ligand-binding if their corresponding residues in the holo proteins are in contact with the ligand. The database search was performed in the same way as it was done for holo proteins: A binding pocket of an apo protein was compared against the pockets in the non-redundant binding pocket database and ligands were predicted for the query apo pocket by computing the Pocket-Score<sub>w</sub> from the ranked list of retrieved pockets.

**Table S4.** An example of top 10 hits by a query pocket, 1gco\_A that binds NAD

| Rank  | PDB ID of the pocket | Binding ligand (PDB code) | Structure of ligand                                                                  | SIMCOMP Score <sup>b</sup> |
|-------|----------------------|---------------------------|--------------------------------------------------------------------------------------|----------------------------|
| Query | 1gco_A               | NAD                       |  | 1.0                        |
| 1     | 1lj8_A               | NAD                       |  | 1.0                        |
| 2     | 1ebw_AB              | BEI                       |  | 0.17                       |
| 3     | 3b4y_A               | F42_FLC <sup>a</sup>      |  | 0.26                       |
| 4     | 3oa2_ACD             | NAD                       |  | 1.0                        |

|    |        |                 |                                                                                    |      |
|----|--------|-----------------|------------------------------------------------------------------------------------|------|
| 5  | 1bxk_A | NAD             | 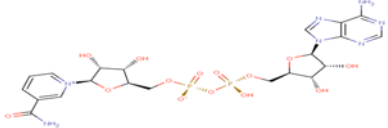 | 1.0  |
| 6  | 3c1o_A | NAP             |  | 0.88 |
| 7  | 1nuq_A | DND             |  | 0.87 |
| 8  | 2jhf_A | NAD             |  | 1.0  |
| 9  | 1nyt_B | NAP             |  | 0.88 |
| 10 | 2whh_A | PPN_GLU_PPN_GLU |  | 0.11 |

- a) Two ligands, F42 and FLC bind to the pocket and they are closer than 4.5 Å.  
b) SIMCOMP score to NAD, the ligand that is binding to the query pocket.

**Figure S1.** Average accuracy using *M*Score with different combinations of *k* and *w*1 values.

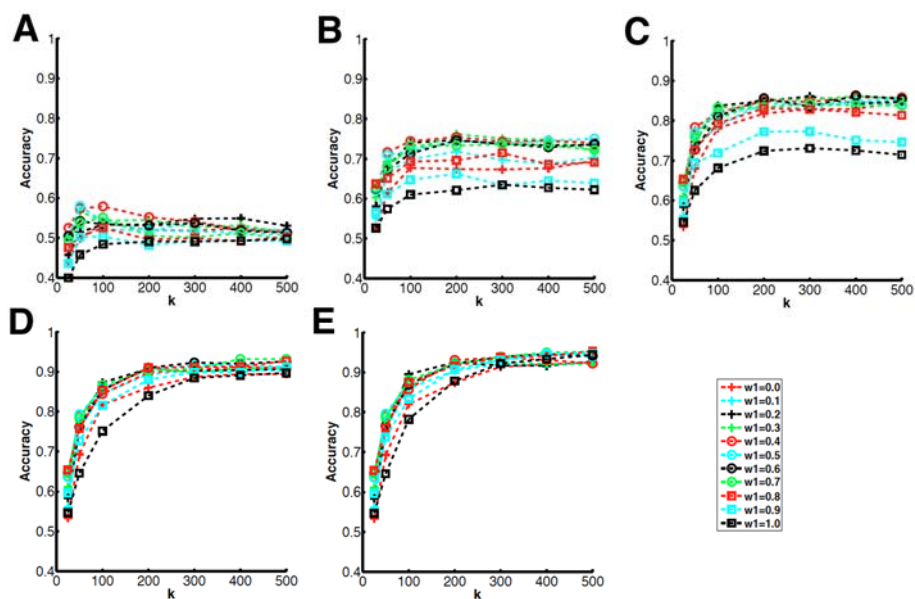

Different lines correspond to results with different *w*1. **A**, Top5 accuracy; **B**, Top10; **C**, Top15; **D**, Top20; and **E**, Top25 accuracy. The panels for Top 10 and Top 15 accuracy are also shown in Figure 2 in the main text.

**Figure S2.** Average accuracy using *TScore* with different combinations of  $k$  and  $w_2$  values.  $w_1$  is set to 0.4.

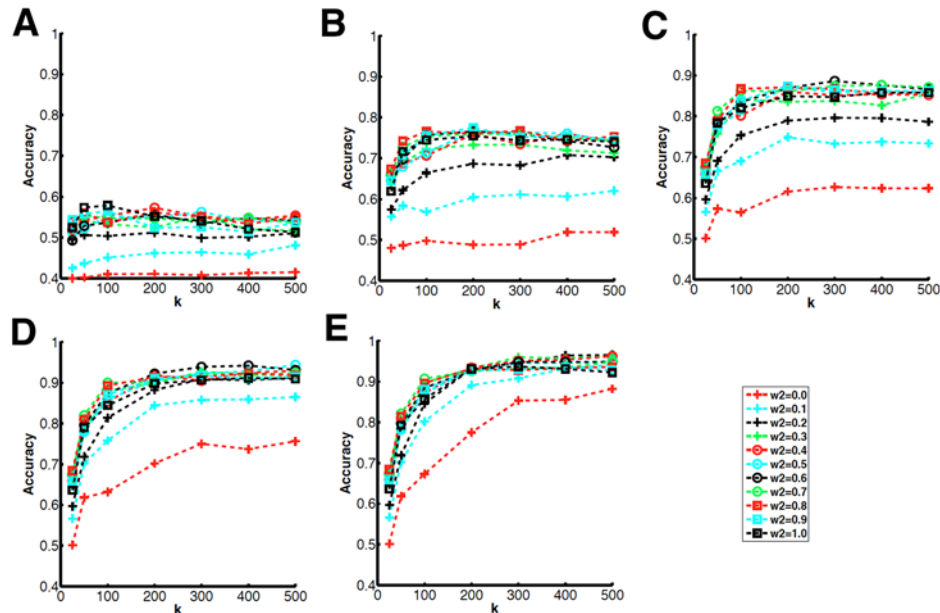

A, Top5 accuracy; B, Top10; C, Top15; D, Top20; and E, Top25 accuracy.

**Figure S3.** Ranks of the correct ligands for holo and apo proteins.

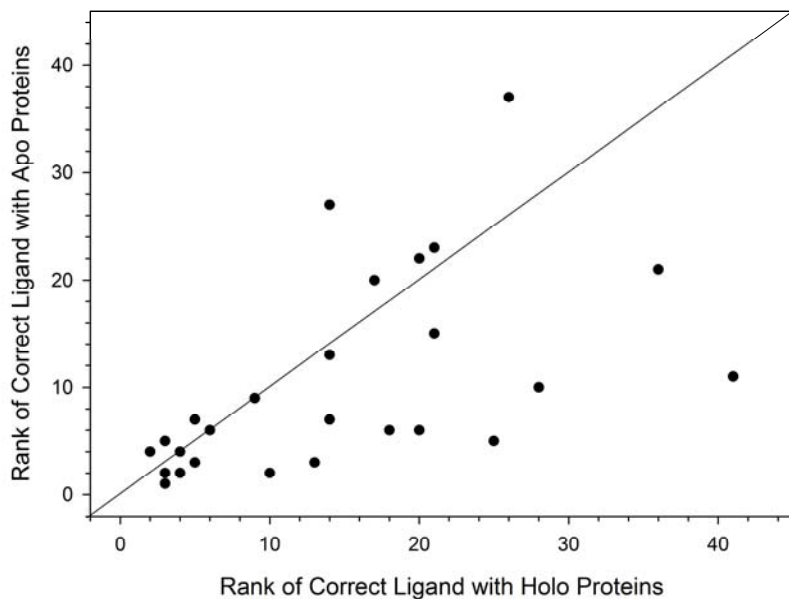

Binding ligands are predicted for holo and apo proteins in Table S3 and the ranks of the correct ligands are plotted. Holo and apo protein pairs with – in the rank column were excluded from this plot.
